---

**The *atp* operon: nucleotide sequence of the region encoding the  $\alpha$ -subunit of *Escherichia coli* ATP-synthase**

---

N.J. Gay and J.E. Walker

---

The Laboratory of Molecular Biology, The MRC Centre, Hills Road, Cambridge CB2 2QH, UK

---

Received 6 March 1981

---

**ABSTRACT**

Part of the *atp* (or *unc*) operon encoding the  $\alpha$ ,  $\beta$ ,  $\gamma$ ,  $\delta$  and  $\epsilon$  subunits of *Escherichia coli* ATP-synthase has been cloned into the plasmid pACYC 184. The DNA coding for the largest of these proteins, the  $\alpha$  subunit, has been sequenced by cloning into the bacteriophage M13 and sequencing with dideoxy nucleotide chain terminators. It comprises 1539 nucleotides corresponding to a protein of 513 amino acids.

**INTRODUCTION**

The structure of the membrane bound ATP synthase complex of *Escherichia coli* closely resembles that of mitochondria and chloroplasts [1,2]. It comprises an intrinsic membrane fraction ( $F_0$ ) and an extrinsic portion,  $F_1$ , which can be solubilised intact.  $F_1$  contains five different polypeptides designated  $\alpha$ ,  $\beta$ ,  $\gamma$ ,  $\delta$  and  $\epsilon$  for which a stoichiometry of 3:3:1:1:1 has been proposed [3], although this is not universally accepted [4]. The catalytic site of synthesis of ATP from ADP is found within  $F_1$  [1,2]. Bacterial  $F_0$  contains three polypeptides [5] and forms a proton channel coupling the vectorial movement of protons by energy transducing membranes to ATP synthesis [1]. The entire bacterial complex is encoded by the *atp* [6] (or *unc* [2]) operon located at about 83 minutes on the *E. coli* chromosomal map [7] close to the origin of replication, *oriC*. Genetic analysis suggests that the  $F_0$  polypeptides are clustered at the promoter proximal portion of the operon and are followed by the genes encoding  $F_1$  subunits [2,6,8], but an unambiguous order of genes has not yet been established [6,8,9]. *UncA* and *uncD* genes have been assigned to the  $\alpha$  and  $\beta$  subunits respectively [2]. In the present work we have precisely located the *uncA* gene and determined its coding sequence.

### MATERIALS AND METHODS

#### Cloning and preparation of DNA

DNA from bacteriophage  $\lambda$ Asn5 containing about 26 kilobases of the *E. coli* chromosome including *asn*, *oriC*, *atp* (or *unc*), *glmS* and *bglC*, R was prepared as described elsewhere [10]. We thank C. Lichtenstein and S. Brenner for providing us with samples of phage DNA and *E. coli* KY7485 [9]. An *EcoRI* digest of this DNA was ligated into the *EcoRI* site of plasmid pACYC184 located in the *CamR* gene [11] and transformed into *E. coli*-K12 HB101 [12]. Clones containing recombinant plasmids were identified by their antibiotic resistance markers (*Tc* resistant, *Cam* sensitive) and then screened by the alkaline SDS procedure [13] followed by *EcoRI* digestion and agarose gel electrophoresis. Recombinant plasmids pN5R1 and pN5R2 containing R1 and R2 respectively were obtained by this procedure. Plasmid pN5R1 was then amplified with chloroamphenicol and prepared by a scaled up version of this procedure from a 2 L bacterial culture. Fragment R1 was excised from plasmid and purified by preparative agarose gel electrophoresis in a 1% gel according to Sanger *et al.* [14].

#### Ligation into M13

The whole fragment, R1, was cloned into the *EcoRI* site and digests with *SalI* and *AccI* similarly cloned into their corresponding sites of M13mp7 by published methods [14-16]. *IaqI* and *HpaII* digests were cloned into the *AccI* site and *Sau3A* digests into the *BamI* site of the same vector. Digests with *AluI*, *HaeIII* and *HpaI* were blunt-end ligated into the *HincII* site of M13mp7, pretreated with calf intestinal phosphatase (Worthington) as described elsewhere [17].

#### Transformation and nucleotide sequencing

Transformation of *E. coli* JM101[ $\Delta$ (*lacpro*)*supE*, *Thi*, *F'**tra* D36 *pro* AB *lac* 1<sup>q</sup> $\Delta$ M15] [18] and purification of recombinant phages was carried out according to [17]. Clones were sequenced by the dideoxy chain termination method [14, 19] using a synthetic primer 17 nucleotides in length complementary to a region of M13mp7 immediately adjacent to the linker sequence [20]. Nucleotide sequences were compiled and analysed with the aid of computer programs described by Staden [21-23].

### RESULTS

#### Cloning of genes for the F1 polypeptides

The genes for the five F1 polypeptides have been mapped previously to a region of the *E. coli* chromosome shown in detail in Figure 1(a) and appear to

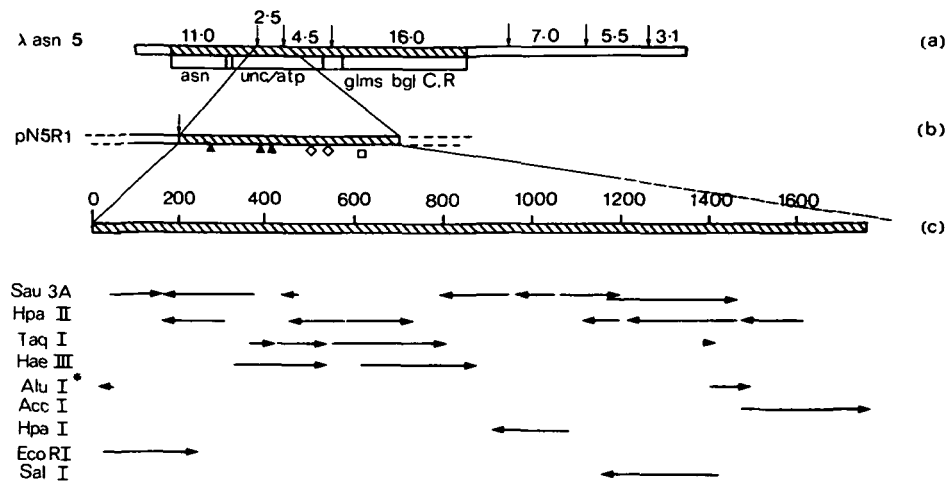

**Figure 1.** The genetic and restriction map in the region of the *atp* operon. (a) The extent of *E. coli* chromosomal DNA in transducing phage  $\lambda$ Asn5 (hatched). *EcoRI* restriction sites are shown by arrows, *EcoRI* fragment sizes are given in kilobases [2,6]. (b) Plasmid pN5R1 containing the 2.5 kilobase *EcoRI* fragment, R1 (hatched). Restriction sites are denoted by  $\blacktriangle$  *HpaI*,  $\diamond$  *SalI* and  $\square$  *HindIII*. (c) The portion of fragment R1, with nucleotide numbers, sequenced in the present work. The arrows indicate the 5' ends of the various clones sequenced by the M13 shotgun-dideoxy chain termination strategy [15]; the length of arrows shows the length of the sequence determined. \* The *AluI* clone containing nucleotides 1-73 contained both ends of fragment R1 in which the *EcoRI* ends had been religated.

be contained within two *EcoRI* fragments (R1 and R2) of approximately 2.5 and 4.5 kilobases respectively [8,9]. Accordingly these two fragments were cloned into plasmid from an *EcoRI* digest of  $\lambda$ Asn5 DNA (Figure 1b). Their identities were confirmed by comparison of their mobilities on agarose gels with an *EcoRI* digest of  $\lambda$ Asn5 and by restriction digestion analysis with the enzyme *PstI* in the case of R2 (A. Eberle, unpublished work).

#### Nucleotide sequence

Fragment R1 was cloned into the *EcoRI* site of M13mp7 and isolated in both orientations. Then the sequence for about 200 bases was determined at each end of the clone. This allowed the orientation of the clone to be determined since sequence corresponding to the  $\text{NH}_2$ -terminal sequence of the  $\alpha$ -subunit could be identified [14]. This showed that an *EcoRI* site was located between nucleotides 9 and 10 of the coding sequence and hence that all of the coding sequence for  $\alpha$  except for the first nine nucleotides has

been determined (see legend to Figure 2). The sequence of R1 was extended almost to completion by random sequencing of restriction digests by the M13 cloning chain termination procedure [19]. A search for restriction sites in the partial sequence revealed HpaI sites at nucleotides 910 and 1102 (as numbered in the final sequence). The fragment between these two sites was cloned from an HpaI digest and on sequence analysis gave the final overlap. A summary of the clones used to establish the sequence is given in Figure 1(c). Most regions of the sequence (95%) are covered by two or more independent clones and 51% of the sequence has been determined on both strands. The nucleotide sequence of the coding region of the ATP-synthase  $\alpha$ -subunit and the deduced protein sequence are shown in Figure 2.

### DISCUSSION

#### Comparison with the $\alpha$ -protein

The nucleotide sequence described here agrees exactly with the independently determined sequence of E. coli ATP-synthetase  $\alpha$ -subunit from amino acid residues 4-30 and with the C-terminal residue tryptophan determined by hydrazinolysis of the protein [24]. The molecular weight of the protein calculated from the sequence is 55,423 daltons, compared with values of  $54\text{--}60 \times 10^3$  daltons determined by polyacrylamide gel electrophoresis under denaturing conditions [2]. The amino acid composition of the  $\alpha$ -subunit derived from DNA sequence is compared in Table 1 with that determined by analysis of hydrolysates of the  $\alpha$ -subunit [24]. The two sets of values are in good agreement, the only major discrepancy being between the values for the number of alanine residues.

Further support for the protein sequence described here has been obtained by amino acid sequence analysis of peptides isolated from a cyanogen bromide digest of the  $\alpha$ -subunit of bovine mitochondrial ATP-synthase (N.J.G., M.J. Runswick, M. Saraste and J.E.W., unpublished results). These sequences are homologous with regions of the E. coli  $\alpha$ -subunit sequence as depicted in Figure 2.

#### Codon usage

It has already been observed that codon usage in other E. coli genes is non-random with striking preferences for certain codons [5]. The codon usage in the sequence described here (Table 2) resembles especially the codon usages described for prolipoprotein, the most abundant protein in the E. coli cell [26], and certain ribosomal proteins [27,18]. In these cases codon usage reflects tRNA abundance: codons corresponding to abundant iso-accepting

2191

Figure 2. The nucleotide sequence of the coding region of the  $\alpha$ -subunit of *E. coli* ATP-synthetase. Nucleotides 1-8 are derived from the protein sequence [14]. This allows two ambiguities at the underlined position 6 (A or G) and 7 (T or C). Nucleotide 9 was deduced from the specificity of *EcoRI*. The remainder was sequenced experimentally as described. Boxed regions of the protein sequence correspond to the published NH<sub>2</sub>-terminal sequences [24] and to homologous sequences of cyanogen bromide peptides of the bovine mitochondrial subunit (unpublished work). The carboxyl terminal residue tryptophan was determined by hydrazinolysis [24].

determined by hydrazinolysis  
[24]

Table 1

Amino acid composition of the  $\alpha$ -subunit of *E. coli* ATP-synthase

| Amino acid    | From DNA sequence | Recalculated from [24] |
|---------------|-------------------|------------------------|
| Asparagine    | 16                | 43.4                   |
| Aspartic acid | 28                |                        |
| Threonine     | 23                |                        |
| Serine        | 32                | 33.6                   |
| Glutamine     | 29                | 60.7                   |
| Glutamic acid | 31                |                        |
| Proline       | 18                | 19.3                   |
| Glycine       | 47                | 50.0                   |
| Alanine       | 54                | 62.1                   |
| Cysteine      | 3                 | 3.6                    |
| Valine        | 41                | 44.4                   |
| Methionine    | 12                | 9.6                    |
| Isoleucine    | 40                | 37.6                   |
| Leucine       | 48                | 47.7                   |
| Tyrosine      | 15                | 14.7                   |
| Phenylalanine | 14                | 13.7                   |
| Histidine     | 7                 | 6.9                    |
| Lysine        | 24                | 23.6                   |
| Arginine      | 30                | 28.8                   |
| Tryptophan    | 1                 | 1.0                    |
| TOTAL         | 513               | -                      |

tRNAs are preferred (for a summary of tRNA abundance in *E. coli* see supplement to ref. 28). This may be because of the need of the cell for either efficient or high fidelity translation of essential proteins [28]. Codon usages in genes of abundant proteins differ strikingly from those observed in genes expressed at low levels where rarer codons are used more frequently. (For a quantitative assessment of the role of codon usage in expression of *E. coli* genes see ref. 25.)

An interesting feature of the *atp* operon is that the proteins of the ATPase complex are not present in stoichiometric amounts with (possibly) three copies of  $\alpha$  and  $\beta$  to each copy of  $\gamma$ ,  $\delta$  and  $\epsilon$  [3]. Codon usage may provide a mechanism for modulation of expression of the different cistrons in

Table 2

Codon usage in *uncA*. The numbers exclude the first three codons which have not been unambiguously assigned.

|   | U          | C          | A           | G          |
|---|------------|------------|-------------|------------|
| U | UUU Phe 1  | UCU Ser 11 | UAU Tyr 4   | UGU Cys 3  |
|   | UUC Phe 13 | UCC Ser 16 | UAC Tyr 11  | UGC Cys 0  |
|   | UUA Leu 0  | UCA Ser 0  | UAA Ochre 1 | UGA Opal 0 |
|   | UUG Leu 2  | UCG Ser 1  | UAG Amber 0 | UGG Trp 1  |
| C | CUU Leu 3  | CCU Pro 1  | CAU His 0   | CGU Arg 25 |
|   | CUC Leu 4  | CCC Pro 0  | CAC His 7   | CGC Arg 5  |
|   | CUA Leu 1  | CCA Pro 3  | CAA Gln 4   | CGA Arg 1  |
|   | CUG Leu 38 | CCG Pro 14 | CAG Gln 24  | CGG Arg 0  |
| A | AUU Ile 10 | ACU Thr 4  | AAU Asn 2   | AGU Ser 2  |
|   | AUC Ile 30 | ACC Thr 17 | AAC Asn 14  | AGC Ser 2  |
|   | AUA Ile 0  | ACA Thr 2  | AAA Lys 19  | AGA Arg 0  |
|   | AUG Met 11 | ACG Thr 0  | AAG Lys 5   | AGG Arg 0  |
| G | GUU Val 24 | GCU Ala 16 | GAU Asp 12  | GGU Gly 28 |
|   | GUC Val 2  | GCC Ala 8  | GAC Asp 18  | GGC Gly 16 |
|   | GUA Val 9  | GCA Ala 18 | GAA Glu 27  | GGA Gly 1  |
|   | GUG Val 6  | GCG Ala 12 | GAG Glu 4   | GGG Gly 1  |

the *atp* operon. Analysis of other genes in this operon should test this idea.

#### ACKNOWLEDGEMENTS

We thank Dr. S. Brenner for drawing our attention to phage  $\lambda$ Asn5, Dr. B.G. Barrell for discussions, and Dr. F. Sanger for encouragement and advice.

#### REFERENCES

1. Futai, M. and Kanazawa, H. (1980) Curr. Topics Bioenerg. 10, 181-215.
2. Downie, J.A., Gibson, F. and Cox, G.B. (1979) Ann. Rev. Biochem. 48, 103-131.
3. Bragg, P.D. and Hou, C. (1975) Arch. Biochem. Biophys. 167, 311-321.
4. Vogel, G. and Steinhardt, R. (1976) Biochemistry 15, 208-216.

5. Foster, D.L., Mosher, M.E., Futai, M. and Fillingame, R.H. (1980) *J. Biol. Chem.* 255, 12037-12041.
6. von Meyenberg, K. and Hansen, F.G. (1980) In: "Mechanistic Studies of DNA Replication and Genetic Recombination" ICH-UCLA Symp. Vol. XIX, Alberts, B. and Fox, C.F., Eds. Academic Press, New York, in the press.
7. Bachman, B.J. and Low, B.K. (1980) *Microbiol. Rev.* 44, 1-56.
8. Downie, J.A., Langmans, L., Cox, G.B., Yanofsky, C. and Gibson, F. (1980) *J. Bact.* 143, 8-17.
9. Kanazawa, H., Tamura, F., Mabuchi, K., Miki, T. and Futai, M. (1980) *Proc. Nat. Acad. Sci. USA* 77, 7005-7009.
10. Lichtenstein, C. (1980) Ph.D. thesis, Cambridge.
11. Chang, A.C.Y. and Cohen, S.N. (1978) *J. Bact.* 134, 1141-1156.
12. Boyer, H.W. and Roulland-Dussiox, D. (1969) *J. Mol. Biol.* 41, 459-472.
13. Birnboim, H.C. and Doly, J. (1979) *Nucleic Acids Res.* 7, 1513-1529.
14. Sanger, F., Coulson, A.R., Barrell, B.G., Smith, A.J.H. and Roe, B.A. (1980) *J. Mol. Biol.* 143, 161-178.
15. Winter, G. and Fields, S. (1980) *Nucleic Acids Res.* 8, 1965-1974.
16. Messing, J., Gronenborn, B., Müller-Hill, B. and Hofschneider, P.H. (1977) *Proc. Nat. Acad. Sci. USA* 74, 3642-3646.
17. Winter, G., Fields, S. and Gait, M.J. (1981) *Nucleic Acids Res.* 9, 237-245.
18. Messing, J. (1979) *Recombinant DNA Technical Bulletin* 2, 43-48.
19. Sanger, F., Nicklen, S. and Coulson, A.R. (1977) *Proc. Nat. Acad. Sci. USA* 74, 5463-5467.
20. Duckworth, M.L., Gait, M.J., Golet, P., Hong, G.F., Singh, M. and Titmas, R.C. (1981) *Nucleic Acids Res.*, submitted for publication.
21. Staden, R. (1977) *Nucleic Acids Res.* 4, 4037-4051.
22. Staden, R. (1978) *Nucleic Acids Res.* 5, 1013-1015.
23. Staden, R. (1979) *Nucleic Acids Res.* 6, 2601-2610.
24. Dunn, S.D. (1980) *J. Biol. Chem.* 255, 11857-11860.
25. Grantham, R., Gautier, C., Gony, M., Jacobzone, M. and Mercier, R. (1981) *Nucleic Acids Res.* 9, r43-r74.
26. Nakamura, K., Pirtle, R.M., Pirtle, I.L., Takeishi, K. and Inouye, M. (1980) *J. Biol. Chem.* 255, 210-216.
27. Post, L.E., Strycharz, G.D., Nomura, M., Lewis, H. and Dennis, P.P. (1979) *Proc. Nat. Acad. Sci. USA* 76, 16970-1701.
28. Post, L.E. and Nomura, M. (1980) *J. Biol. Chem.* 255, 4660-4666.
